# Supplementary material for: Micro-RNA Analysis of Pancreatic Cyst Fluid for Diagnosing Malignant Transformation of Intraductal Papillary Mucinous Neoplasm by Comparing Intraductal Papillary Mucinous Adenoma and Carcinoma
Source: MDPI journal article supplement (doi:10.3390/jcm10112249), 2021-05-22
Supplement: s1 [file s1]

**Table S1.** Clinical and pathological features of IPMN lesions comparing IPMA with IPMC.

| Items                                       | IPMA           | IPMC               |
|---------------------------------------------|----------------|--------------------|
| Number of patients, n                       | 8              | 4                  |
| Age, years, median (range)                  | 73.5 (68-76)   | 67.5 (48-76)       |
| Gender, male/female, n                      | 5/3            | 2/2                |
| IPMN lesions                                |                |                    |
| Site of lesions, head/neck/body/tail/MPD, n | 2/1/4/1/0      | 0/0/2/1/1          |
| Diameter of the lesions, mm, median (range) | 38.5 (18-54)   | 40 (34-75)         |
| Presence of septum, n                       | 6              | 3                  |
| Presence of nodule, n                       | 5              | 2                  |
| Communication with MPD, n                   | 8              | 2                  |
| Serum CA19-9, U/ml, median (range)          | 6.4 (0.1-19.4) | 131.65 (15-4500.7) |

IPMA, intraductal papillary mucinous adenoma; IPMC, intraductal papillary mucinous carcinoma; IPMN, intraductal papillary mucinous neoplasm; MPD, main pancreatic duct
